# Supplementary material for: Biodepolymerization of Polyamide Fibers Using Yarrowia lipolytica as Whole-Cell Biocatalyst
Source: MDPI journal article supplement (doi:10.3390/fermentation10050239), 2024-04-30
Supplement: s1 [file s1]

# Biodepolymerization of polyamide fibers using *Yarrowia lipolytica* as whole-cell biocatalyst

## Supplementary Materials

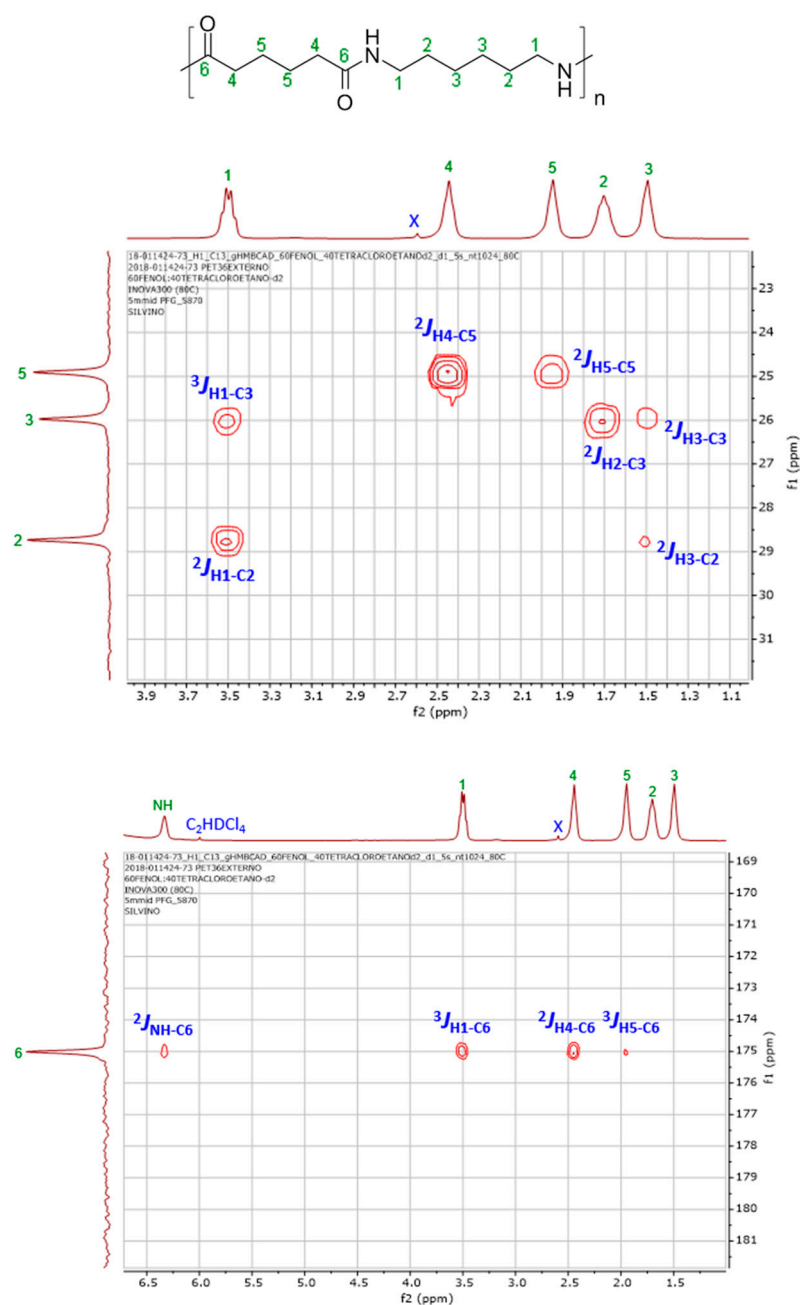

**Figure S1.** Labeled polyamide-6,6 chemical structure and gHMBC NMR spectrum expanded regions of PAF. X = impurity.

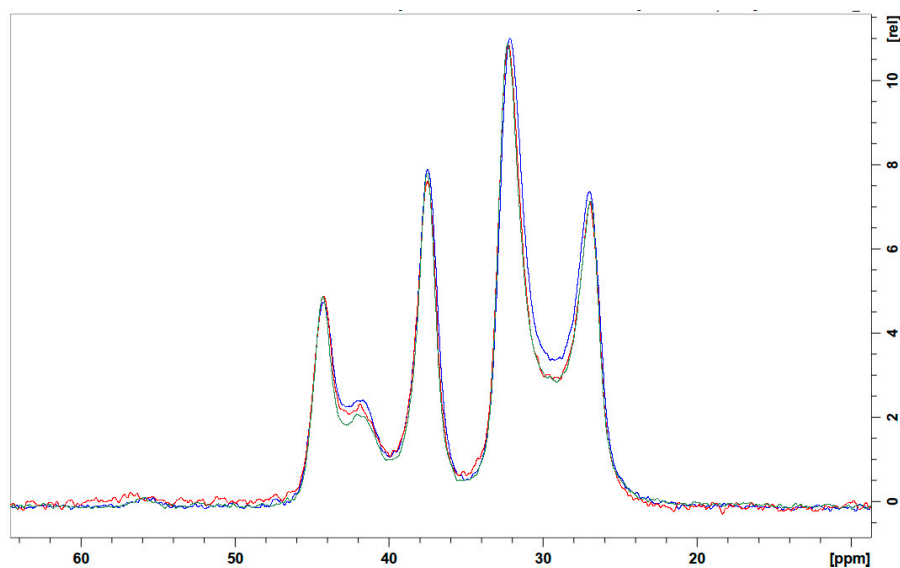

**Figure S2.** Aliphatic region of  $^{13}\text{C}$  CP/MAS NMR spectra of PAF: Control  $< 0.5 \text{ g.L}^{-1} < 2 \text{ g.L}^{-1}$ .

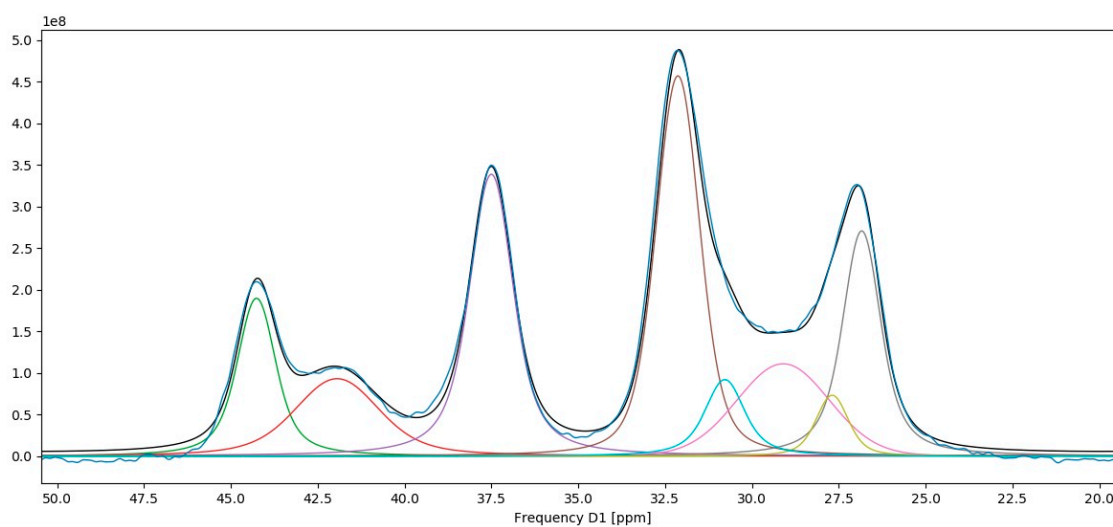

| Position | Integral  | Lorentz | Gauss  |
|----------|-----------|---------|--------|
| 44.26    | 4.160e+10 | 91.26   | *108.0 |
| 41.94    | 4.240e+10 | 152.6   | *270.0 |
| 37.50    | 8.522e+10 | 107.9   | *120.0 |
| 32.13    | 1.053e+11 | 65.57   | *150.0 |
| 29.10    | 4.798e+10 | 26.58   | *380.0 |
| 26.84    | 6.057e+10 | 100.9   | *100.0 |
| 27.69    | 1.300e+10 | 63.64   | *100.0 |
| 30.78    | 2.141e+10 | 107.5   | *100.0 |

Crystalline phase = 49.5%

Amorphous phase = 50.5%

**Figure S3.** Deconvoluted aliphatic region of  $^{13}\text{C}$  CP/MAS NMR spectrum of PAF control.

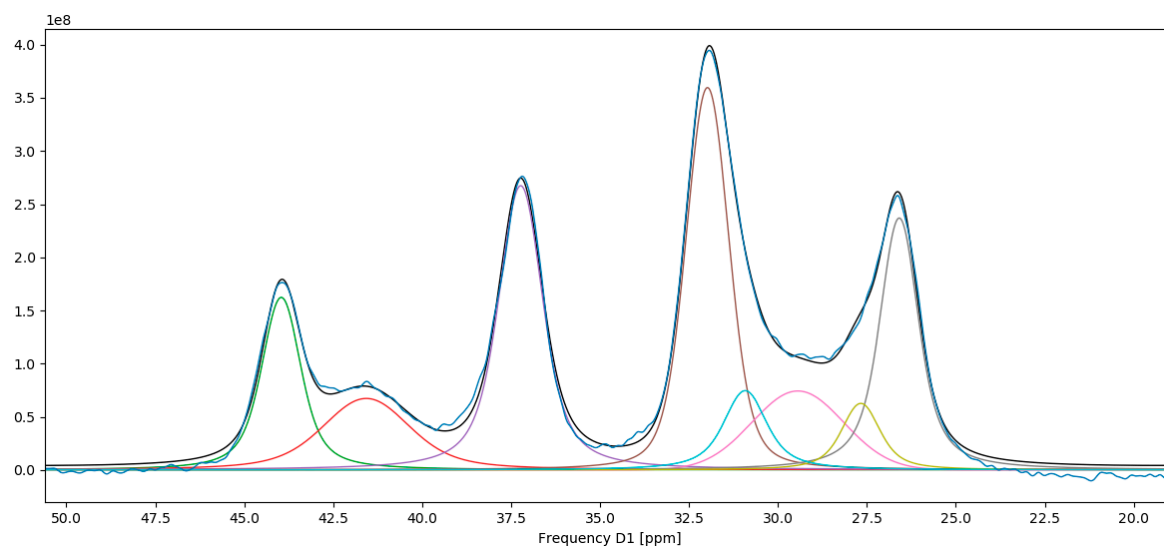

| Position | Integral  | Lorentz   | Gauss  |
|----------|-----------|-----------|--------|
| 43.96    | 3.530e+10 | 89.98     | *108.0 |
| 41.57    | 3.129e+10 | 161.2     | *270.0 |
| 37.23    | 6.613e+10 | 104.6     | *120.0 |
| 31.98    | 7.732e+10 | 52.03     | *150.0 |
| 29.44    | 3.009e+10 | 1.268e-08 | *380.0 |
| 26.59    | 5.219e+10 | 98.24     | *100.0 |
| 27.67    | 1.363e+10 | 95.98     | *100.0 |
| 30.92    | 1.878e+10 | 122.2     | *100.0 |

Crystalline phase = 53.0%

Amorphous phase = 47.0%

**Figure S4.** Deconvoluted aliphatic region of  $^{13}\text{C}$  CP/MAS NMR spectrum of the sample with  $0.5 \text{ g.L}^{-1}$  of PAF.

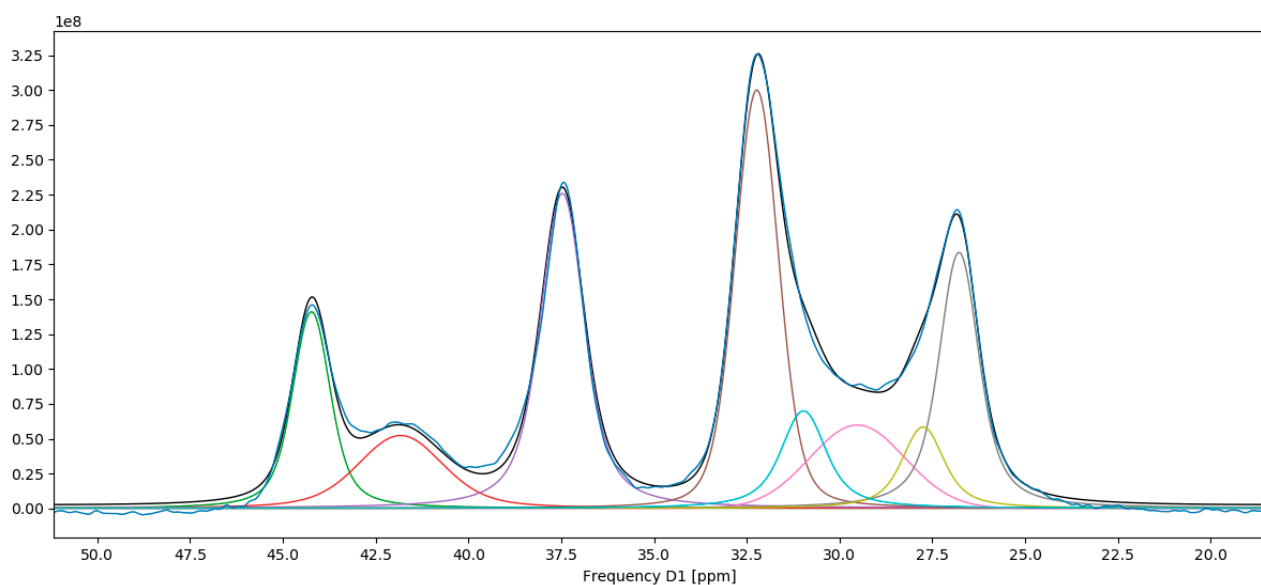

| Position | Integral  | Lorentz   | Gauss  |
|----------|-----------|-----------|--------|
| 44.23    | 2.735e+10 | 70.94     | *108.0 |
| 41.83    | 2.191e+10 | 121.9     | *270.0 |
| 37.47    | 5.320e+10 | 95.15     | *120.0 |
| 32.23    | 6.127e+10 | 42.35     | *150.0 |
| 29.52    | 2.421e+10 | 6.524e-11 | *380.0 |
| 26.78    | 3.971e+10 | 95.19     | *100.0 |
| 27.75    | 1.347e+10 | 106.3     | *100.0 |
| 30.97    | 1.760e+10 | 122.3     | *100.0 |

Crystalline phase = 55.5%

Amorphous phase = 44.5%

**Figure S5.** Deconvoluted aliphatic region of  $^{13}\text{C}$  CP/MAS NMR spectrum of the sample with  $2 \text{ g.L}^{-1}$  of PAF.
